# Supplementary material for: Beyond the Bowel: Novel Comorbidity Patterns in Inflammatory Bowel Disease from the All of Us Research Program
Source: medRxiv preprint, doi:10.1101/2025.06.01.25328740, version 1 (2025-06-02)
Supplement: Supplementary Table 2 [file 328740_file04.xlsx]

## Sheet: Sheet1
Drugs the IBD Patients were on
Methotrexate
Mercaptopurine
Tofacitinib
Upadacitinib
Vedolizumab
Adalimumab
Certolizumab pegol
Golimumab
Infliximab
Risankizumab
Ustekinumab
Azathioprine
Prednisolone
Budesonide
Prednisone
Balsalazide
Mesalamine
Olsalazine
Sulfasalazine
Methylprednisolone
